# Supplementary material for: Oxaliplatin aggravates hepatic oxidative stress, inflammation and fibrosis in a non-alcoholic fatty liver disease mouse model
Source: PubMed Central journal article supplement — Int J Mol Med. 2019 Apr 1;43(6):2398–408. doi: 10.3892/ijmm.2019.4154 (PMC6488186; doi:10.3892/ijmm.2019.4154), 2019-04-01
Supplement: IJMM-43-06-2398-supp.pdf [file IJMM-43-06-2398-supp.pdf]

Table SI. Primer sequences for RT-qPCR.

| Product                        | Forward primer sequence   | Reverse primer sequence   |
|--------------------------------|---------------------------|---------------------------|
| <i>IL-6</i>                    | GAGGATACCACTCCCAACAGACC   | AAGTGCATCATCGTTGTTTCATACA |
| <i>IL-17</i>                   | AGAGCTGCCCCTTCACTTTC      | GGGGTTTCTTAGGGGTCAGC      |
| <i>IFN</i>                     | AAAAACCTAAAAAATCTAAATAACT | ATCAACAACAACCTCTTTTCCACTT |
| <i>TNF</i>                     | GGCAGGTCTACTTTGGAGTCATTGC | ACATTCGAGGCTCCAGTGMTTCGG  |
| <i><math>\alpha</math>-SMA</i> | ACCAACTGGGACGACATGGAA     | TGTCAGCAGTGTCCGGATGCTC    |
| <i>TIMP-1</i>                  | ATTCAAGGCTGTGGGAAATG      | CTCAGAGTACGCCAGGGAAC      |
| <i>TGF-<math>\beta</math></i>  | CCCGAACCCCATTTGCTGTCC     | AGGCGTATCAGTGGGGGTCAG     |
| <i>GAPDH</i>                   | CGGATTTGGTCGTATTGGG       | CTCGCTCCTGGAAGATGG        |

RT-qPCR, reverse transcription-quantitative polymerase chain reaction; IL, interleukin; IFN, interferon; TNF, tumor necrosis factor; SMA, smooth muscle actin; TIMP, tissue inhibitor of metalloproteinase; TGF, transforming growth factor; GAPDH, glyceraldehyde 3-phosphate dehydrogenase.
